# Supplementary material
Source: Springer Nature journal article supplement (https://www.springermedizin.de/resource/supplementary/13054_2009_8397_MOESM2_ESM.pdf/9731874)
Supplement: MOESM2 [file 9731874]

Patients admitted to the ICU  
During the study period  
(n=5306)

Excluded n=2720  
< 18 years (n=537)  
< 24 hours (n=2183)

Patients assessed for  
eligibility (n=2586)

Excluded n=923  
Deceased in the ICU (n=265)  
Deceased in the hospital (n=367)  
Deceased after discharge <6 months (n=150)  
Readmitted patients to ICU (n= 141)

Alive 6 months after  
discharge (n=1663)

Lost to follow up n=683  
Refused or to ill (n= 409)  
No answer (n=247)  
Unknown address (n=27)

Participate at 6 month  
(n=980)

Age 18-74 (n=780)  
Age 75 or over (n=200)

Deceased (n= 31)  
Refused (n=210)

Participate at 12 month  
(n=739)

Age 18-74 (n=586)  
Age 75 or over (n=153)

Deceased (n= 55)  
Refused (n=89)

Participate at 24 month  
(n=595)

Age 18-74 (n=475)  
Age 75 or over (n=120)

Deceased (n=37)  
Refused (n=80)

Participate at 36 month  
(n=478)

Age 18-74 (n=388)  
Age 75 or over (n=90)
